# Supplementary material for: Green-Synthesized Sm3+-Doped ZnO Nanoparticles for Multifunctional Applications
Source: Hindawi journal article supplement (doi:10.1155/2024/3618390), 2024-02-10
Supplement: f1 [file 3618390.f1.docx]

Table1. Targeted applications with ZnO material

| **Materials** | **Synthesis method** | **Application** | **Ref** |
| --- | --- | --- | --- |
| ZnO Nanoparticals | Green Synthesis | Antibacterial, antifungal, anti-diabetic, anti-inflammatory | 1 |
| zinc oxide nanoparticle embedded nitrogen-doped carbon sheet | Hydrothermal | Biosensor | 6 |
| Ce-doped ZnO | Wet-chemical | Photocatalytic & Antibacterial | 8 |
| Sm-doped ZnO nanorods | Hydrothermal | Magnetic Behaviour | 9 |
| RE doped ZnO nanosphere | Chemical precipitation | Photocatalytic | 10 |
| Doped ZnO nanoparticles | Sol-Gel, CombustionHydrothermal | Medical Applications | 14 |
| Ag-ZnO-rGO nanoparticles | Combustion | Photocatalytic | 15 |
| ZnO nanoparticles | Combustion | Multifunctional Applications | 16 |
| Ga-doped ZnO nanorod | Hydrothermal | Electrical performance | 19 |
| La-doped & Cu-doped ZnO nanowire | Hydrothermal | Magnetic Properties | 20 |
| ZnO nanopartcicles | Combustion | Biomedical Applications andToxicity Studies | 23 |
| Silver doped ZnO nPs | Combustion | Effect on Drug Release | 27 |

Table 2. Comparison of crystallite size with various synthesis route.

| **Material** | **Synthesis Method** | **Crystallite Size (nm)** | **Ref no.** |
| --- | --- | --- | --- |
| Cu : ZnO | Co precipitation | 27 | 7 |
| Gd: ZnO | Hydrothermal | 50 | 19 |
| ZnO | Combustion | 12 | 28 |
| ZnO | Combustion | 21 | 36 |
| Ag:ZnO | Combustion | 30 | 36 |
| ZnO | Combustion | 35 | 54 |
| Sm: ZnO | Combustion | 25 | Present |

Table 3: Comparison study of different dye degradations

| **Photocatalysts** | **Dyes** | **Degradation efficiency (%)** | **Ref** |
| --- | --- | --- | --- |
| CuO | FOR | 88 | 45 |
| CuO | DG | 85 | 45 |
| MgO: Bi2O3: Fe2O3 | FOR | 82 | 45 |
| Sm doped ZnO | MB | 83 | 46 |
| CdO–NiO–ZnO | MB | 86 | 47 |
| Sm dopped ZnO | FOR | 88 | Present |

Table 4: Comparison study of antibacterial activities

| **Bacteria** | **Materials** | **Zone of inhibition(mm)** | **Ref** |
| --- | --- | --- | --- |
| Escherichia coli. | ZnO | 10.5 | 55 |
| Ag-ZnO | 14.5 | 55 |
| ZnO | - | 56 |
| Ag-ZnO | - | 56 |
| Sm: ZnO | 18 | Present |
| Pseudomonas aeruginosa | ZnO | 0 | 55 |
| Ag-ZnO | 13.4 | 55 |
| ZnO | - | 56 |
| Ag-ZnO | - | 56 |
| Sm: ZnO | 17 | Present |
| Streptococcus aureus. | ZnO | 10.6 | 55 |
| ZnO | 21.6 | 54 |
| ZnO | 15 | 56 |
| ZnLaSmO | 13 | 57 |
| Ag-ZnO | 16.8 | 55 |
| Ag;ZnO | 25 | 56 |
| Sm: ZnO | 26 | Present |
| Bacillus subtilis | Sm: ZnO | 13 | Present |

W-H plots of Sm3+ doped ZnO nanoparticles.


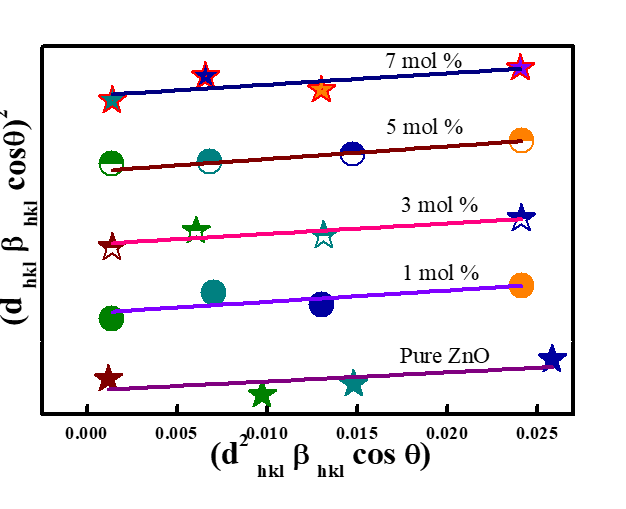


SS Plots of Sm3+ doped ZnO nanoparticles

EDS analysis of Sm3+ doped ZnOnanoparticles

Fig. Time Span of Fast Orange Red dye.

Reusability test of Sm3+ doped ZnO, nanoparticles

% of Degradation of Sm3+ doped ZnO, nanoparticles

% of Degradation, (C/C0) Spectra of Sm3+ doped ZnO, nanoparticles.
